# Supplementary material for: Early Neuroprotective Effects of Bovine Lactoferrin Associated with Hypothermia after Neonatal Brain Hypoxia-Ischemia in Rats
Source: MDPI journal article supplement (doi:10.3390/ijms242115583), 2023-10-25
Supplement: s1 [file s1]

**Table S1.** List of primers used for RT-qPCR.

|                                 | <b>Forward</b>                    | <b>Reverse</b>                    |
|---------------------------------|-----------------------------------|-----------------------------------|
| <b>GAPDH</b>                    | GAA CAT CAT CCC TGC ATC CA        | GCC AGT GAG CTT CCC GTT CA        |
| <b>GFAP</b>                     | CAG ACT TTC TCC AAC CTC CAG       | CTC CTG CTT CGA GTC CTT AAT G     |
| <b>Glut-1</b>                   | GCA TCG TCG TTG GGA TCC T         | CAA GTC TGC ATT GCC CAT GA        |
| <b>GRIN2a (NMDAr2A)</b>         | TCA CAG GCG TGT GCT CTG A         | AAC TAT AGA TGC CCC TGC TGA TG    |
| <b>HCAR1</b>                    | GTG TTG GCG AGG CTC TAC TT        | AAC ACA CTT GGA GAC CCC AC        |
| <b>HIF-1<math>\alpha</math></b> | TGG AAT GGA GCA GAA GAC AAT TT    | GGT AAT CCA CTC TCA TCC ATT GAC T |
| <b>IL-1<math>\beta</math></b>   | GGC AAC TGT CCC TGA ACT CAA       | GCC TCA AAG AAC AGG TCA TTC TC    |
| <b>MCT-1</b>                    | GGG CGC CGC GAG ATA               | GGC ATC TTA GGT GTC GAT GAA TT    |
| <b>MCT-2</b>                    | GCT TCT TTC AGC AGC AGT GTG       | TGA ATG CTA ATC CTA AAC CTC CAA   |
| <b>MCT-4</b>                    | GCT GGC TAT GCT GTA TGG C         | TTG AGA GCC AGA CCC AAG C         |
| <b>Slc1a3 (GLAST)</b>           | CAT TGG AGG GTT GCT GCA A         | GCA GGG TGG CAG AAC TTG AG        |
| <b>S100B</b>                    | CAT CAA CAA CGA GCT CTC TCA CTT   | CAT CAC TTT GTC CAC CAC TTC CT    |
| <b>TNF-<math>\alpha</math></b>  | GAC CCT CAC ACT CAG ATC ATC TTC T | TCC GCT TGG TGG TTT GCT A         |
